# Supplementary material
Source: PubMed Central journal article supplement (PMC2268792)

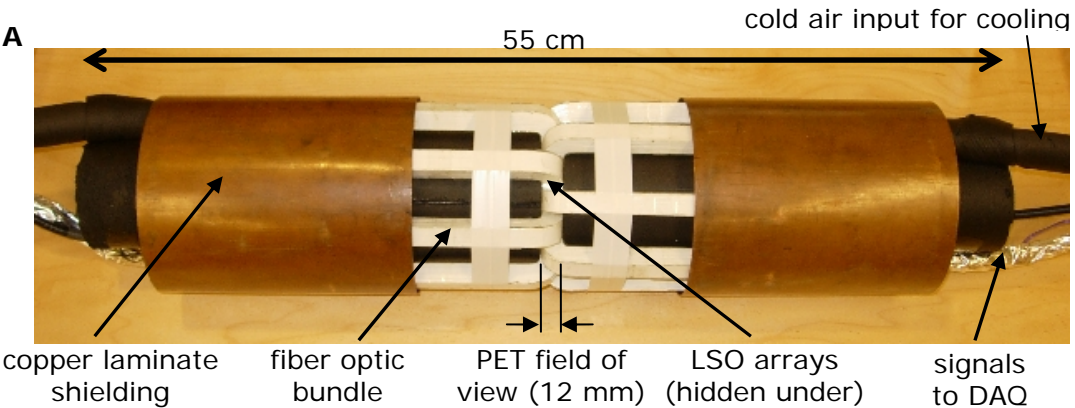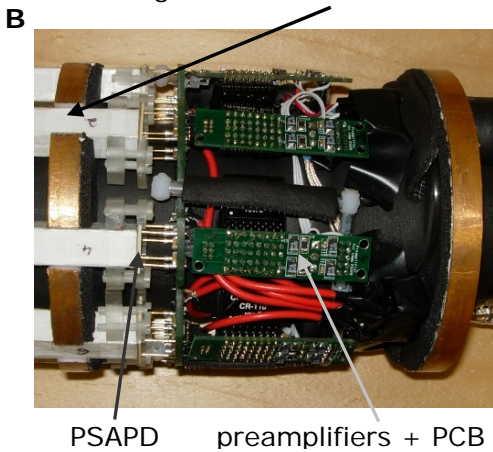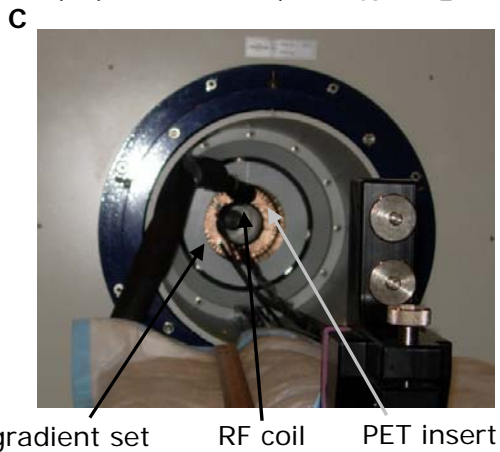

Supplement: pnas_0711622105_1.pdf [file pnas_0711622105_1.pdf]
