# Supplementary material
Source: PubMed Central journal article supplement (PMC2268792)
Supplement: pnas_0711622105_2.pdf [file pnas_0711622105_2.pdf]

100

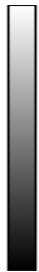

0

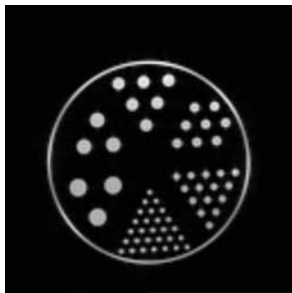

PET on

-

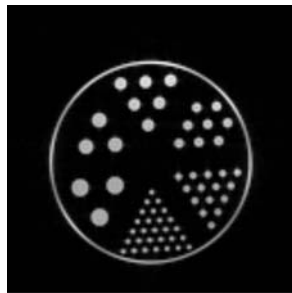

PET off

=

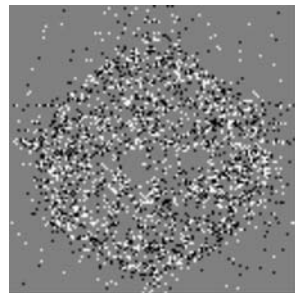

+1

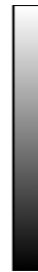

-1

100

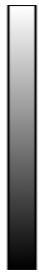

0

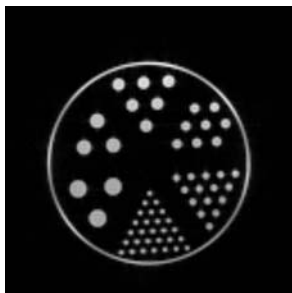

PET off

-

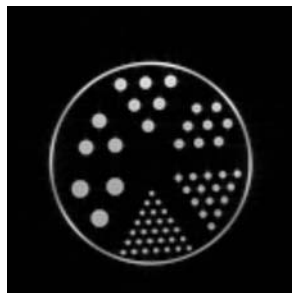

PET off

=

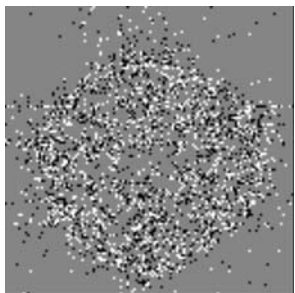

+1

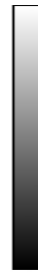

-1
