# Supplementary material
Source: PubMed Central journal article supplement (PMC2268792)

**A**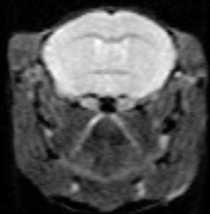**B**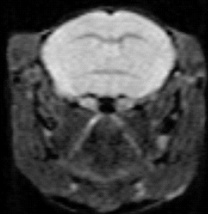**C**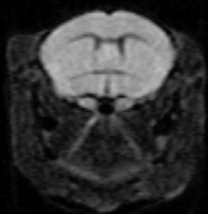**D**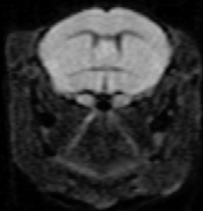**E**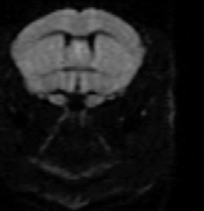

Supplement: pnas_0711622105_3.pdf [file pnas_0711622105_3.pdf]
